# Supplementary material
Source: PubMed Central journal article supplement (PMC3136249)
Supplement: 1108924108_pnas.201108924SI.pdf [file 1108924108_pnas.201108924SI.pdf]

# Supporting Information

Kriegel et al. 10.1073/pnas.1108924108

## SI Materials and Methods

**Mice.** Mice were purchased from Taconic Farms (TAC) (BALB/cAnNTac, C57BL/6NTac, NOD/MrkTac) or the Jackson Laboratory (JAX) (BALB/cJ, C57BL/6J, NOD/ShiLtJ) or were housed at our specific pathogen-free facility at the New Research Building (NRB) at Harvard Medical School. For mice from either JAX or TAC, feces were collected within 24 h of arrival for quantification of segmented filamentous bacteria (SFB). Female nonobese diabetic (NOD) mice housed at the NRB facility were used except when noted otherwise. The NOD colony at the NRB facility is replenished occasionally from a separate breeding stock kept at the Jackson Laboratory (independent of the commercial facility there). All mouse experiments were approved by the Institutional Animal Care and Use Committee of Harvard Medical School.

**Tissue Collection and DNA Isolation.** Fecal pellets were collected with alcohol-cleaned forceps under a laminar flow hood, placed in sterile tubes, frozen immediately on dry ice, and stored at  $-80^{\circ}\text{C}$  until processing. Intestinal tissues were dissected surgically, separated into the relevant anatomical segments (small intestine, colon), and frozen immediately on dry ice before storage at  $-80^{\circ}\text{C}$ . The distal small intestine was defined as the lower half of the complete small intestine, to avoid any sex- or age-related differences in length. Weighed tissue segments first were homogenized with an autoclaved sonicator in 0.5 mL of a buffer containing 0.2 mg/mL proteinase K, 100 mM NaCl, 10 mM Tris, and 100 mM EDTA. The sonicator was washed with sterile double-distilled water and alcohol between each sample, and sterile spleens were processed after every 5–10 tissue samples as negative controls. Two or three frozen fecal pellets in lysis buffer or 0.5 mL of each homogenate were transferred into autoclaved cryotubes containing 500  $\mu\text{L}$  of 0.1-mm zirconium beads (Biospec Products) and freshly added 20% SDS (210  $\mu\text{L}$ ). Fecal pellets were bead beaten for 2 min and tissues were bead beaten for 4 min using a minibeater (Biospec), followed by phenol-chloroform extraction of DNA, as described elsewhere (1). SYBR Green real-time PCR was performed with 20 ng of fecal or tissue DNA using SFB-specific [SFB736 forward and SFB884 reverse (2)] and conserved eubacterial (EUB) 1114 forward and 1221 reverse (3) 16S ribosomal DNA primers. Primer sequences are as follows:

SFB736 forward: GACGCTGAGGCATGAGAGCAT  
SFB884 reverse: GACGGCACGGATTGTTATTCA  
EUB1114 forward: CGGCAACGAGCGCAACCC  
EUB1221 reverse: CCATTGTAGCACGTGTGTAGCC

Genomic DNA from spleens and bacterial DNA from *Staphylococcus epidermidis* and *Escherichia coli* were used as SFB-negative controls.

**Diabetes and Insulinitis Assessments.** Mice were screened weekly for diabetes development starting at 10 wk of age. Glucosuria was measured by dipstick analysis of urine (Diasix; Ames). Onset of diabetes was confirmed by blood-glucose measurements. Mice were considered diabetic if measurements of blood glucose were  $>250$  mg/dL on three consecutive readings. Mice without glucosuria were followed until at least 30 wk of age, at which point they were considered protected.

For evaluation of insulinitis, pancreata were dissected and immediately fixed in 10% formalin (Sigma Aldrich) before being embedded in paraffin, sectioned, and stained with H&E. Insulinitis

was assessed by light microscopy and was graded according to the following scheme: no insulinitis, peri-insulinitis (perivascular/periductular infiltrates with leukocytes touching islet perimeters), or insulinitis (leukocytic penetration of any degree).

**Preparation of Intestinal Cell Suspensions for Immunological Analyses.** The small intestine and colon were dissected from 6- to 10-wk-old NOD mice, and residual mesenteric fat was removed. Peyer's patches were excised carefully before longitudinal opening of the intestinal segment, which then was thoroughly washed in ice-cold PBS and cut into 2- to 3-cm pieces. Segments from a single intestine were incubated twice in 25 mL of 5 mM EDTA and 0.145 mg/mL DL-DTT in DMEM for 30 min at  $37^{\circ}\text{C}$  at a rotation speed of 200 rpm. Next, the epithelial cell layer containing intraepithelial lymphocytes was removed by intensive vortexing and passage through a 100- $\mu\text{m}$  cell strainer. The intestinal bits were rolled over paper tissue to remove excess mucus and then were washed in PBS, cut into 1-mm<sup>2</sup> pieces using scissors, and placed in 25 mL digestion solution containing 1 mg/mL each of type II collagenase from *Clostridium histolyticum* (Sigma), 0.15 mg/mL DNase I (Sigma), and 200 ng/mL Liberase Cl (Roche). After the intestinal bits were incubated at  $37^{\circ}\text{C}$  for 40 min with rotation, the cell suspension was vortexed intensely and passed through a 100- $\mu\text{m}$  strainer. Supernatants then were passed through a 40- $\mu\text{m}$  cell strainer, and the cells were resuspended in 10% DMEM for flow cytometric analysis.

**Flow Cytometry.** Cell suspensions were isolated as above from intestinal regions of female NOD mice at 6–10 wk of age or from the pancreatic lymph nodes and spleens by organ dissection and glass slide disruption (4). Cells were surface stained with fluorophore-labeled mAbs specific for CD45 (30-F11), CD4 (RM4-5), CD8 (53-6.7), T-cell receptor  $\beta$  (TCR $\beta$ ) (H57–597), and T-cell receptor  $\gamma\delta$  (TCR $\gamma\delta$ ) (GL3), all purchased from BioLegend. For intracellular cytokine staining, cells were incubated immediately after isolation for 4 h with 50 ng/mL phorbol 12-myristate 13-acetate (Sigma), 1  $\mu\text{M}$  ionomycin (Sigma), and BD GolgiPlug (1:1,000 dilution) at  $37^{\circ}\text{C}$ . Staining was performed using Cytofix/Cytoperm (BD Pharmingen) according to the manufacturer's instructions. mAbs recognizing IL-17 (TC11-18H10.1) or IFN- $\gamma$  (XMG1.2) were purchased from BioLegend and BD Pharmingen, respectively. The forkhead box P3 Staining Buffer Set (clone FJK-16S; eBioscience) was used for intracellular staining following the manufacturer's instructions. Cells were run on an LSRII machine (BD Biosciences), and data were analyzed with FloJo software (TreeStar).

**Microarray Analysis.** CD4<sup>+</sup> T cells were isolated from spleen and small-intestinal lamina propria (SI-LP) of 6- to 10-wk-old mice as described previously (5). Cells were sorted using a Becton Dickinson FACSria into TRIzol reagent (Invitrogen) based on the following cell surface markers: CD45<sup>+</sup>, CD8a<sup>+</sup>, CD11b<sup>+</sup>, CD11c<sup>+</sup>, CD19<sup>+</sup>, B220<sup>+</sup>, Gr-1<sup>+</sup>, TCR $\beta$ <sup>+</sup>, and CD4<sup>+</sup>. RNA was isolated following the manufacturer's protocol. RNA was amplified for two rounds (MessageAmp aRNA; Ambion), biotin labeled (BioArray High Yield RNA Transcription Labeling; Enzo), and purified using the RNeasy Mini Kit (Qiagen). The resulting cRNAs were hybridized to Affymetrix GeneChip Mouse Gene 1.0 ST arrays (Expression Analysis). Raw data were normalized using the robust means analysis algorithm. Data were visualized using the Multiplot and Hierarchical Clustering Viewer modules from the GenePattern suite (Broad Institute) (6). All cell populations

**PNAS**

**PNAS**

- PNAS**

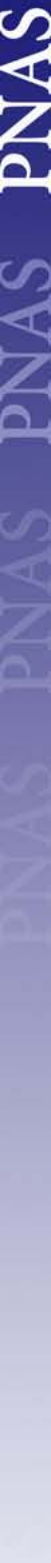

**PNAS**



**PNAS**



Table S1. Cont.

| ProbeSet ID | Gene symbol  | NOD SI-LP (SFB <sup>+</sup> ) average (n = 4) | Coefficient of variation among SFB <sup>+</sup> mice | NOD SI-LP (SFB <sup>-</sup> ) average (n = 6) | Coefficient of variation among SFB <sup>-</sup> mice | SFB <sup>+</sup> vs. SFB <sup>-</sup> fold-change | False discovery rate |
|-------------|--------------|-----------------------------------------------|------------------------------------------------------|-----------------------------------------------|------------------------------------------------------|---------------------------------------------------|----------------------|
| 10438405    | Igl-V1       | 38.2                                          | 0.06                                                 | 107.5                                         | 0.63                                                 | 0.36                                              | NS                   |
| 10502622    | Ctca3        | 48.2                                          | 0.13                                                 | 123.0                                         | 0.64                                                 | 0.39                                              | NS                   |
| 10502613    | Al747448     | 22.9                                          | 0.24                                                 | 55.5                                          | 0.62                                                 | 0.41                                              | NS                   |
| 10418341    | Il17rb       | 89.3                                          | 0.25                                                 | 215.2                                         | 0.39                                                 | 0.41                                              | NS                   |
| 10359689    | Atp1b1       | 109.1                                         | 0.17                                                 | 260.8                                         | 0.40                                                 | 0.42                                              | NS                   |
| 10384223    | Igfbp3       | 57.1                                          | 0.21                                                 | 135.8                                         | 0.76                                                 | 0.42                                              | NS                   |
| 10545569    | Reg3g        | 30.6                                          | 0.20                                                 | 72.5                                          | 0.77                                                 | 0.42                                              | NS                   |
| 10503098    | Lyn          | 88.3                                          | 0.28                                                 | 209.1                                         | 0.76                                                 | 0.42                                              | NS                   |
| 10558992    | Muc2         | 58.6                                          | 0.38                                                 | 134.6                                         | 0.52                                                 | 0.44                                              | NS                   |
| 10447383    | Epcam        | 135.8                                         | 0.28                                                 | 310.6                                         | 0.45                                                 | 0.44                                              | NS                   |
| 10460746    | Naaladl1     | 25.6                                          | 0.10                                                 | 58.1                                          | 0.57                                                 | 0.44                                              | NS                   |
| 10379615    | Sl           | 74.1                                          | 0.17                                                 | 166.2                                         | 0.33                                                 | 0.45                                              | NS                   |
| 10416689    | Olfr4        | 62.8                                          | 0.44                                                 | 137.6                                         | 0.44                                                 | 0.46                                              | NS                   |
| 10538921    | LOC100046350 | 28.1                                          | 0.06                                                 | 59.9                                          | 0.92                                                 | 0.47                                              | NS                   |
| 10506488    | Ppap2b       | 60.6                                          | 0.88                                                 | 126.7                                         | 0.81                                                 | 0.48                                              | NS                   |
| 10491952    | Mgst2        | 155.6                                         | 0.11                                                 | 325.5                                         | 0.19                                                 | 0.48                                              | 3.46E-06             |
| 10531931    | Sparcl1      | 76.5                                          | 0.62                                                 | 159.3                                         | 0.97                                                 | 0.48                                              | NS                   |

Average values, coefficients of variation, and false-discovery rates are listed for each up- or down-regulated transcript. Note that these mouse-to-mouse comparisons showed more within-group variability than we routinely observe in comparisons of cells from secondary lymphoid organs, as reflected by high within-group coefficients of variation and poor false discovery rates (FDR) (Table S1), even if the shifts are fully reproducible (Fig. S2).

**Table S2. Genes encoding transcripts that were up-regulated or down-regulated more than twofold in colonic lamina propria CD4<sup>+</sup> T cells sorted from SFB-positive vs. SFB-negative NOD mice**

| ProbeID                                | Gene symbol   | NOD colon<br>lamina propria<br>(SFB <sup>+</sup> ) average* | Coefficient of<br>variation among<br>SFB <sup>+</sup> mice | NOD colon<br>lamina propria<br>(SFB <sup>-</sup> ) average† | Coefficient of<br>variation among<br>SFB <sup>-</sup> mice | SFB <sup>+</sup> vs.<br>SFB <sup>-</sup> fold-<br>change | False<br>discovery<br>rate |
|----------------------------------------|---------------|-------------------------------------------------------------|------------------------------------------------------------|-------------------------------------------------------------|------------------------------------------------------------|----------------------------------------------------------|----------------------------|
| Genes up-regulated more than twofold   |               |                                                             |                                                            |                                                             |                                                            |                                                          |                            |
| 10545135                               | Il12rb2       | 199.9                                                       | 0.04                                                       | 60.3                                                        | 0.36                                                       | 3.32                                                     | 0.00                       |
| 10345791                               | Il1rl1        | 330.5                                                       | 0.19                                                       | 105.2                                                       | 0.43                                                       | 3.14                                                     | 0.16                       |
| 10361771                               | Plagl1        | 325.6                                                       | 0.02                                                       | 113.4                                                       | 0.44                                                       | 2.87                                                     | 0.00                       |
| 10502052                               | Alpk1         | 293.9                                                       | 0.21                                                       | 106.9                                                       | 0.23                                                       | 2.75                                                     | NS                         |
| 10533569                               | Kdm2b         | 1234.6                                                      | 0.05                                                       | 458.8                                                       | 0.46                                                       | 2.69                                                     | 0.00                       |
| 10535904                               | Hsph1         | 1386.7                                                      | 0.59                                                       | 523.3                                                       | 0.29                                                       | 2.65                                                     | NS                         |
| 10586252                               | Dennd4a       | 395.2                                                       | 0.12                                                       | 153.0                                                       | 0.72                                                       | 2.58                                                     | NS                         |
| 10586254                               | Dennd4a       | 1103.4                                                      | 0.03                                                       | 431.1                                                       | 0.73                                                       | 2.56                                                     | NS                         |
| 10586248                               | Dennd4a       | 593.8                                                       | 0.03                                                       | 234.0                                                       | 0.67                                                       | 2.54                                                     | 0.15                       |
| 10502050                               | Alpk1         | 240.5                                                       | 0.02                                                       | 95.0                                                        | 0.09                                                       | 2.53                                                     | 0.00                       |
| 10586246                               | Dennd4a       | 834.5                                                       | 0.06                                                       | 330.8                                                       | 0.68                                                       | 2.52                                                     | NS                         |
| 10586250                               | Dennd4a       | 495.0                                                       | 0.13                                                       | 197.9                                                       | 0.74                                                       | 2.50                                                     | NS                         |
| 10392183                               | Ern1          | 493.2                                                       | 0.08                                                       | 205.3                                                       | 0.36                                                       | 2.40                                                     | 0.00                       |
| 10420308                               | Gzmb          | 951.6                                                       | 0.24                                                       | 397.1                                                       | 0.45                                                       | 2.40                                                     | NS                         |
| 10580382                               | Neto2         | 105.7                                                       | 0.62                                                       | 44.5                                                        | 0.85                                                       | 2.37                                                     | NS                         |
| 10349081                               | Phlpp1        | 339.0                                                       | 0.05                                                       | 144.2                                                       | 0.23                                                       | 2.35                                                     | 0.00                       |
| 10365933                               | Eea1          | 468.9                                                       | 0.23                                                       | 202.0                                                       | 0.17                                                       | 2.32                                                     | NS                         |
| 10586700                               | Rora          | 761.8                                                       | 0.02                                                       | 328.4                                                       | 0.34                                                       | 2.32                                                     | 0.00                       |
| 10363070                               | Gp49a         | 591.6                                                       | 0.37                                                       | 255.3                                                       | 0.34                                                       | 2.32                                                     | NS                         |
| 10453867                               | Rbbp8         | 314.5                                                       | 0.17                                                       | 135.8                                                       | 0.36                                                       | 2.32                                                     | NS                         |
| 10594251                               | Kif23         | 657.6                                                       | 0.23                                                       | 292.3                                                       | 0.65                                                       | 2.25                                                     | NS                         |
| 10428536                               | Trps1         | 260.2                                                       | 0.08                                                       | 116.6                                                       | 0.32                                                       | 2.23                                                     | 0.00                       |
| 10568956                               | Olfr60        | 39.6                                                        | 0.12                                                       | 17.9                                                        | 0.13                                                       | 2.21                                                     | 0.00                       |
| 10586244                               | Dennd4a       | 580.2                                                       | 0.04                                                       | 264.4                                                       | 0.60                                                       | 2.19                                                     | NS                         |
| 10436209                               | Cblb          | 2597.4                                                      | 0.28                                                       | 1188.7                                                      | 0.59                                                       | 2.19                                                     | NS                         |
| 10392207                               | Tex2          | 802.9                                                       | 0.04                                                       | 372.8                                                       | 0.52                                                       | 2.15                                                     | 0.34                       |
| 10544084                               | Zc3hav1l      | 404.1                                                       | 0.14                                                       | 189.6                                                       | 0.61                                                       | 2.13                                                     | NS                         |
| 10540472                               | Bhlhe40       | 948.7                                                       | 0.11                                                       | 447.3                                                       | 0.33                                                       | 2.12                                                     | 0.03                       |
| 10429926                               | Dgat1         | 1434.4                                                      | 0.19                                                       | 682.8                                                       | 0.76                                                       | 2.10                                                     | NS                         |
| 10453678                               | Zeb1          | 824.0                                                       | 0.08                                                       | 395.7                                                       | 0.19                                                       | 2.08                                                     | 0.00                       |
| 10406254                               | Ell2          | 277.5                                                       | 0.09                                                       | 134.3                                                       | 0.49                                                       | 2.07                                                     | NS                         |
| 10358408                               | Rgs1          | 888.8                                                       | 0.48                                                       | 432.6                                                       | 0.22                                                       | 2.05                                                     | NS                         |
| 10409278                               | Nfil3         | 740.8                                                       | 0.10                                                       | 363.2                                                       | 0.14                                                       | 2.04                                                     | 0.00                       |
| 10548735                               | Dusp16        | 336.1                                                       | 0.21                                                       | 164.8                                                       | 0.43                                                       | 2.04                                                     | NS                         |
| 10349603                               | Il10          | 731.4                                                       | 0.48                                                       | 360.0                                                       | 0.33                                                       | 2.03                                                     | NS                         |
| 10531415                               | Cxcl10        | 794.9                                                       | 0.15                                                       | 391.4                                                       | 0.30                                                       | 2.03                                                     | NS                         |
| 10358191                               | Camsap11l     | 703.6                                                       | 0.02                                                       | 348.0                                                       | 0.33                                                       | 2.02                                                     | 0.00                       |
| 10439527                               | Tigit         | 1316.7                                                      | 0.26                                                       | 654.5                                                       | 0.47                                                       | 2.01                                                     | NS                         |
| 10346651                               | Bmpr2         | 409.7                                                       | 0.30                                                       | 204.1                                                       | 0.06                                                       | 2.01                                                     | NS                         |
| 10586240                               | Dennd4a       | 1869.5                                                      | 0.18                                                       | 931.6                                                       | 0.65                                                       | 2.01                                                     | NS                         |
| Genes down-regulated more than twofold |               |                                                             |                                                            |                                                             |                                                            |                                                          |                            |
| 10472235                               | Dapl1         | 106.3                                                       | 0.10                                                       | 375.0                                                       | 0.44                                                       | 0.28                                                     | NS                         |
| 10530615                               | Ociad2        | 29.2                                                        | 0.16                                                       | 76.9                                                        | 0.99                                                       | 0.38                                                     | NS                         |
| 10347915                               | Gm7609        | 43.8                                                        | 0.03                                                       | 114.9                                                       | 0.12                                                       | 0.38                                                     | 0.00                       |
| 10512640                               | Gne           | 116.2                                                       | 0.05                                                       | 293.1                                                       | 0.84                                                       | 0.40                                                     | NS                         |
| 10351959                               | 1810030J14Rik | 19.2                                                        | 0.19                                                       | 48.5                                                        | 0.96                                                       | 0.40                                                     | NS                         |
| 10451818                               | Sult1c2       | 18.8                                                        | 0.00                                                       | 45.1                                                        | 0.95                                                       | 0.42                                                     | NS                         |
| 10429564                               | Ly6a          | 686.5                                                       | 0.05                                                       | 1647.9                                                      | 0.23                                                       | 0.42                                                     | 0.01                       |
| 10571984                               | Ddx60         | 53.4                                                        | 0.09                                                       | 125.9                                                       | 0.28                                                       | 0.42                                                     | NS                         |
| 10345855                               | Slc9a2        | 46.0                                                        | 0.12                                                       | 103.3                                                       | 0.95                                                       | 0.45                                                     | NS                         |
| 10533345                               | Aldh2         | 96.5                                                        | 0.12                                                       | 215.7                                                       | 0.84                                                       | 0.45                                                     | NS                         |
| 10393573                               | Lgals3bp      | 219.5                                                       | 0.27                                                       | 490.9                                                       | 0.07                                                       | 0.45                                                     | 0.00                       |
| 10503508                               | Ggh           | 46.5                                                        | 0.27                                                       | 103.4                                                       | 0.97                                                       | 0.45                                                     | NS                         |
| 10347925                               | Gm7609        | 54.3                                                        | 0.16                                                       | 119.5                                                       | 0.08                                                       | 0.45                                                     | 0.00                       |
| 10403054                               | LOC435333     | 63.3                                                        | 0.01                                                       | 137.8                                                       | 1.00                                                       | 0.46                                                     | NS                         |
| 10441254                               | Tmprss2       | 57.5                                                        | 0.07                                                       | 125.3                                                       | 0.93                                                       | 0.46                                                     | NS                         |
| 10389143                               | Slfn8         | 80.0                                                        | 0.03                                                       | 168.4                                                       | 0.29                                                       | 0.47                                                     | NS                         |

Table S2. Cont.

| ProbeID  | Gene symbol   | NOD colon lamina propria (SFB <sup>+</sup> ) average* | Coefficient of variation among SFB <sup>+</sup> mice | NOD colon lamina propria (SFB <sup>-</sup> ) average <sup>†</sup> | Coefficient of variation among SFB <sup>-</sup> mice | SFB <sup>+</sup> vs. SFB <sup>-</sup> fold-change | False discovery rate |
|----------|---------------|-------------------------------------------------------|------------------------------------------------------|-------------------------------------------------------------------|------------------------------------------------------|---------------------------------------------------|----------------------|
| 10379615 | Slfn5         | 89.0                                                  | 0.11                                                 | 186.7                                                             | 0.33                                                 | 0.48                                              | NS                   |
| 10494085 | Selenbp2      | 67.8                                                  | 0.19                                                 | 141.3                                                             | 0.84                                                 | 0.48                                              | NS                   |
| 10514779 | Prkaa2        | 22.6                                                  | 0.08                                                 | 47.0                                                              | 0.93                                                 | 0.48                                              | NS                   |
| 10578361 | Asah1         | 50.7                                                  | 0.02                                                 | 104.0                                                             | 0.42                                                 | 0.49                                              | NS                   |
| 10393166 | St6galnac2    | 280.8                                                 | 0.03                                                 | 575.5                                                             | 0.28                                                 | 0.49                                              | NS                   |
| 10458992 | C330018D20Rik | 29.5                                                  | 0.19                                                 | 60.4                                                              | 0.48                                                 | 0.49                                              | NS                   |
| 10406423 | Mblac2        | 45.8                                                  | 0.17                                                 | 93.3                                                              | 0.35                                                 | 0.49                                              | NS                   |
| 10530201 | Ugdh          | 277.6                                                 | 0.07                                                 | 562.8                                                             | 0.96                                                 | 0.49                                              | NS                   |
| 10411082 | Thbs4         | 51.1                                                  | 0.07                                                 | 103.3                                                             | 0.97                                                 | 0.49                                              | NS                   |
| 10570516 | Kbtbd11       | 193.5                                                 | 0.19                                                 | 388.2                                                             | 0.61                                                 | 0.50                                              | NS                   |

Average values, coefficients of variation, and false-discovery rates are listed for each up- or down-regulated transcript.

\*For NOD colon-LP samples that were SFB-positive,  $n = 2$ .

<sup>†</sup>For NOD colon-LP samples that were SFB-negative,  $n = 4$ .
